# Supplementary material
Source: publisher figshare collection journal article supplement (https://gsajournals.figshare.com/ndownloader/files/24459011)
Supplement: Supplementary file 1 [file 24459011]

## Sheet: Wild.isolate.pool
strain
AB1
AB3
CB4854
CB4856
ED3017
ED3021
ED3040
ED3042
ED3052
ED3057
GXW1
JU1400
JU1652
JU300
JU397
JU312
JU322
JU360
JU533
JU642
JU775
LKC34
MY1
MY6
MY14
MY2
PX174
VC20019

## Sheet: WI.mean.fc.rate
series	strain	mean.fcr	rep.num	group
bli-5.rep1	JU312	-0.499547	5	bli-5
bli-5.rep1	ED3021	-0.21146	5	bli-5
bli-5.rep1	JU322	-0.688829	5	bli-5
bli-5.rep1	AB1	-0.214027	5	bli-5
bli-5.rep1	MY2	-0.155323	5	bli-5
bli-5.rep1	JU360	-0.657535	5	bli-5
bli-5.rep1	CB4854	0.180305	5	bli-5
bli-5.rep1	JU642	-0.222903	5	bli-5
bli-5.rep1	JU775	-0.867133	5	bli-5
bli-5.rep1	ED3040	-0.138309	5	bli-5
bli-5.rep1	JU397	-0.719594	5	bli-5
bli-5.rep1	AB3	-0.494668	5	bli-5
bli-5.rep1	VC20019	-0.135684	5	bli-5
bli-5.rep1	MY6	-0.200891	5	bli-5
bli-5.rep1	GXW1	-0.3541	5	bli-5
bli-5.rep1	CB4856	-0.598053	5	bli-5
bli-5.rep1	MY14	-0.254616	5	bli-5
bli-5.rep1	LKC34	0.307198	5	bli-5
bli-5.rep1	ED3042	-0.0802075	5	bli-5
bli-5.rep1	JU533	-0.463365	5	bli-5
bli-5.rep1	ED3017	0.130033	5	bli-5
bli-5.rep1	MY1	-0.550351	5	bli-5
bli-5.rep1	PX174	0.282995	5	bli-5
bli-5.rep1	JU1400	-0.490172	5	bli-5
bli-5.rep1	JU1652	0.3793	5	bli-5
bli-5.rep1	ED3052	0.32368	5	bli-5
bli-5.rep1	JU300	-0.707781	5	bli-5
bli-5.rep1	ED3057	-0.908321	5	bli-5
bli-5.rep2	JU360	-0.558309	6	bli-5
bli-5.rep2	JU322	-0.645239	6	bli-5
bli-5.rep2	JU533	-0.121761	6	bli-5
bli-5.rep2	AB1	-0.107257	6	bli-5
bli-5.rep2	JU397	-0.578111	6	bli-5
bli-5.rep2	MY2	-0.219027	6	bli-5
bli-5.rep2	CB4856	-0.258211	6	bli-5
bli-5.rep2	JU312	-0.349795	6	bli-5
bli-5.rep2	ED3021	-0.0843468	6	bli-5
bli-5.rep2	ED3040	-0.0874227	6	bli-5
bli-5.rep2	GXW1	-0.339613	6	bli-5
bli-5.rep2	AB3	-0.392154	6	bli-5
bli-5.rep2	CB4854	0.238119	6	bli-5
bli-5.rep2	MY6	-0.0766796	6	bli-5
bli-5.rep2	JU1400	-0.299508	6	bli-5
bli-5.rep2	JU642	-0.105255	6	bli-5
bli-5.rep2	JU775	-0.515858	6	bli-5
bli-5.rep2	LKC34	0.155544	6	bli-5
bli-5.rep2	ED3042	0.0195486	6	bli-5
bli-5.rep2	ED3017	0.217651	6	bli-5
bli-5.rep2	VC20019	0.2183	6	bli-5
bli-5.rep2	MY1	-0.427233	6	bli-5
bli-5.rep2	PX174	0.260031	6	bli-5
bli-5.rep2	JU1652	0.258986	6	bli-5
bli-5.rep2	MY14	-0.258591	6	bli-5
bli-5.rep2	ED3052	0.246256	6	bli-5
bli-5.rep2	JU300	-0.67109	6	bli-5
bli-5.rep2	ED3057	-0.683781	6	bli-5
cgh-1.rep1	AB1	-0.0182488	7	cgh-1
cgh-1.rep1	JU312	-0.211815	7	cgh-1
cgh-1.rep1	JU642	-0.139273	7	cgh-1
cgh-1.rep1	ED3021	0.0419466	7	cgh-1
cgh-1.rep1	JU397	-0.547179	7	cgh-1
cgh-1.rep1	JU322	-0.696512	7	cgh-1
cgh-1.rep1	AB3	-0.228564	7	cgh-1
cgh-1.rep1	ED3040	-0.34621	7	cgh-1
cgh-1.rep1	ED3042	-0.105859	7	cgh-1
cgh-1.rep1	JU360	-0.419439	7	cgh-1
cgh-1.rep1	JU775	-0.272279	7	cgh-1
cgh-1.rep1	MY2	-0.0206457	7	cgh-1
cgh-1.rep1	MY6	-0.25717	7	cgh-1
cgh-1.rep1	JU533	-0.223883	7	cgh-1
cgh-1.rep1	CB4854	-0.0194671	7	cgh-1
cgh-1.rep1	LKC34	0.277569	7	cgh-1
cgh-1.rep1	ED3052	0.151494	7	cgh-1
cgh-1.rep1	PX174	0.262035	7	cgh-1
cgh-1.rep1	CB4856	-0.507474	7	cgh-1
cgh-1.rep1	MY14	-0.130733	7	cgh-1
cgh-1.rep1	VC20019	-0.111887	7	cgh-1
cgh-1.rep1	ED3057	-0.860123	7	cgh-1
cgh-1.rep1	GXW1	0.330685	7	cgh-1
cgh-1.rep1	ED3017	-0.0673533	7	cgh-1
cgh-1.rep1	MY1	-0.294994	7	cgh-1
cgh-1.rep1	JU300	-0.412177	7	cgh-1
cgh-1.rep1	JU1400	-0.235566	7	cgh-1
cgh-1.rep1	JU1652	0.132578	7	cgh-1
cgh-1.rep2	AB1	-0.0902796	8	cgh-1
cgh-1.rep2	JU642	0.180451	8	cgh-1
cgh-1.rep2	ED3021	0.172951	8	cgh-1
cgh-1.rep2	JU312	-0.144734	8	cgh-1
cgh-1.rep2	JU322	-0.529978	8	cgh-1
cgh-1.rep2	JU360	-0.293071	8	cgh-1
cgh-1.rep2	AB3	-0.19496	8	cgh-1
cgh-1.rep2	JU397	-0.0980304	8	cgh-1
cgh-1.rep2	JU533	-0.0315835	8	cgh-1
cgh-1.rep2	MY6	-0.28594	8	cgh-1
cgh-1.rep2	JU775	-0.125906	8	cgh-1
cgh-1.rep2	ED3040	-0.159564	8	cgh-1
cgh-1.rep2	JU1400	-0.237528	8	cgh-1
cgh-1.rep2	VC20019	-0.143014	8	cgh-1
cgh-1.rep2	CB4856	-0.372472	8	cgh-1
cgh-1.rep2	CB4854	-0.0455669	8	cgh-1
cgh-1.rep2	ED3042	-0.0102763	8	cgh-1
cgh-1.rep2	JU300	-0.236485	8	cgh-1
cgh-1.rep2	MY14	-0.233273	8	cgh-1
cgh-1.rep2	LKC34	0.0504744	8	cgh-1
cgh-1.rep2	ED3052	0.121352	8	cgh-1
cgh-1.rep2	ED3057	-0.289842	8	cgh-1
cgh-1.rep2	GXW1	0.313755	8	cgh-1
cgh-1.rep2	ED3017	0.093027	8	cgh-1
cgh-1.rep2	MY2	-0.0388017	8	cgh-1
cgh-1.rep2	JU1652	0.261973	8	cgh-1
cgh-1.rep2	MY1	-0.286367	8	cgh-1
cgh-1.rep2	PX174	0.238309	8	cgh-1
crn-3.rep1	MY1	-0.977677	13	crn-3
crn-3.rep1	JU642	-1.07021	13	crn-3
crn-3.rep1	JU775	-0.864438	13	crn-3
crn-3.rep1	JU312	-0.757001	13	crn-3
crn-3.rep1	MY2	-0.837159	13	crn-3
crn-3.rep1	JU360	-1.39855	13	crn-3
crn-3.rep1	LKC34	-0.381525	13	crn-3
crn-3.rep1	ED3040	-0.294613	13	crn-3
crn-3.rep1	ED3057	-1.47046	13	crn-3
crn-3.rep1	GXW1	-1.58472	13	crn-3
crn-3.rep1	JU397	-1.09127	13	crn-3
crn-3.rep1	JU322	-1.4918	13	crn-3
crn-3.rep1	AB1	-1.75623	13	crn-3
crn-3.rep1	ED3021	-0.651218	13	crn-3
crn-3.rep1	JU300	-0.984651	13	crn-3
crn-3.rep1	MY6	-0.719256	13	crn-3
crn-3.rep1	JU1400	-1.00954	13	crn-3
crn-3.rep1	AB3	-1.68731	13	crn-3
crn-3.rep1	ED3017	-0.74545	13	crn-3
crn-3.rep1	MY14	-0.633378	13	crn-3
crn-3.rep1	ED3042	-1.12018	13	crn-3
crn-3.rep1	JU1652	0.698337	13	crn-3
crn-3.rep1	JU533	-0.528543	13	crn-3
crn-3.rep1	CB4854	-0.372174	13	crn-3
crn-3.rep1	ED3052	-0.101395	13	crn-3
crn-3.rep1	PX174	-0.345263	13	crn-3
crn-3.rep1	CB4856	-0.60818	13	crn-3
crn-3.rep1	VC20019	-0.396443	13	crn-3
crn-3.rep2	AB1	-1.11668	14	crn-3
crn-3.rep2	MY2	-0.643444	14	crn-3
crn-3.rep2	AB3	-1.73577	14	crn-3
crn-3.rep2	JU642	-0.998255	14	crn-3
crn-3.rep2	MY6	-0.708053	14	crn-3
crn-3.rep2	ED3057	-1.41406	14	crn-3
crn-3.rep2	JU322	-0.981068	14	crn-3
crn-3.rep2	JU775	-0.847514	14	crn-3
crn-3.rep2	ED3021	-0.570192	14	crn-3
crn-3.rep2	MY1	-0.680095	14	crn-3
crn-3.rep2	PX174	-0.211979	14	crn-3
crn-3.rep2	JU360	-0.879854	14	crn-3
crn-3.rep2	CB4854	-0.314315	14	crn-3
crn-3.rep2	JU312	-0.779243	14	crn-3
crn-3.rep2	MY14	-0.65025	14	crn-3
crn-3.rep2	VC20019	-0.264392	14	crn-3
crn-3.rep2	JU1652	0.660695	14	crn-3
crn-3.rep2	GXW1	-1.48125	14	crn-3
crn-3.rep2	JU397	-1.0416	14	crn-3
crn-3.rep2	JU533	-0.440165	14	crn-3
crn-3.rep2	LKC34	-0.287299	14	crn-3
crn-3.rep2	ED3040	-0.237573	14	crn-3
crn-3.rep2	JU1400	-1.55146	14	crn-3
crn-3.rep2	CB4856	-0.474352	14	crn-3
crn-3.rep2	JU300	-0.958411	14	crn-3
crn-3.rep2	ED3042	-1.08577	14	crn-3
crn-3.rep2	ED3052	0.0191876	14	crn-3
crn-3.rep2	ED3017	-0.558103	14	crn-3
dpy-11.rep1	JU642	0.04873	33	Control
dpy-11.rep1	ED3017	-0.117287	33	Control
dpy-11.rep1	ED3057	-0.447648	33	Control
dpy-11.rep1	JU533	-0.608088	33	Control
dpy-11.rep1	JU322	-0.447971	33	Control
dpy-11.rep1	MY1	-0.0367599	33	Control
dpy-11.rep1	ED3021	0.0768418	33	Control
dpy-11.rep1	JU312	-0.481569	33	Control
dpy-11.rep1	MY14	-0.209371	33	Control
dpy-11.rep1	JU775	-0.121445	33	Control
dpy-11.rep1	AB1	-0.0266945	33	Control
dpy-11.rep1	LKC34	0.191551	33	Control
dpy-11.rep1	JU397	-0.589913	33	Control
dpy-11.rep1	JU360	-0.283049	33	Control
dpy-11.rep1	MY2	-0.117242	33	Control
dpy-11.rep1	GXW1	0.185396	33	Control
dpy-11.rep1	JU1400	-0.253236	33	Control
dpy-11.rep1	JU300	-0.442594	33	Control
dpy-11.rep1	ED3042	0.200777	33	Control
dpy-11.rep1	ED3040	-0.0687283	33	Control
dpy-11.rep1	CB4854	-0.10701	33	Control
dpy-11.rep1	CB4856	-0.308992	33	Control
dpy-11.rep1	AB3	-0.305278	33	Control
dpy-11.rep1	JU1652	-0.106275	33	Control
dpy-11.rep1	PX174	0.382473	33	Control
dpy-11.rep1	MY6	-0.318157	33	Control
dpy-11.rep1	ED3052	0.17238	33	Control
dpy-11.rep1	VC20019	-0.0839854	33	Control
emb-27.rep1	ED3057	-1.6254	15	emb-27
emb-27.rep1	MY2	-0.918046	15	emb-27
emb-27.rep1	GXW1	-1.5153	15	emb-27
emb-27.rep1	MY1	-0.859708	15	emb-27
emb-27.rep1	JU642	-0.991741	15	emb-27
emb-27.rep1	ED3021	-0.810328	15	emb-27
emb-27.rep1	AB1	-1.52143	15	emb-27
emb-27.rep1	AB3	-1.72087	15	emb-27
emb-27.rep1	JU1400	-1.79719	15	emb-27
emb-27.rep1	JU312	-1.33804	15	emb-27
emb-27.rep1	JU322	-1.52364	15	emb-27
emb-27.rep1	MY6	-1.37326	15	emb-27
emb-27.rep1	ED3040	-0.431825	15	emb-27
emb-27.rep1	ED3042	-1.47192	15	emb-27
emb-27.rep1	PX174	-0.164096	15	emb-27
emb-27.rep1	JU775	-1.64273	15	emb-27
emb-27.rep1	CB4854	0.00735051	15	emb-27
emb-27.rep1	JU300	-1.66046	15	emb-27
emb-27.rep1	MY14	-0.890948	15	emb-27
emb-27.rep1	JU360	-1.2949	15	emb-27
emb-27.rep1	JU1652	0.0813353	15	emb-27
emb-27.rep1	ED3052	0.642932	15	emb-27
emb-27.rep1	JU397	-1.72265	15	emb-27
emb-27.rep1	VC20019	-0.426605	15	emb-27
emb-27.rep1	LKC34	-0.76707	15	emb-27
emb-27.rep1	ED3017	-0.824302	15	emb-27
emb-27.rep1	JU533	-0.82896	15	emb-27
emb-27.rep1	CB4856	-0.528095	15	emb-27
emb-27.rep2	CB4854	-0.100297	16	emb-27
emb-27.rep2	AB3	-1.70741	16	emb-27
emb-27.rep2	MY2	-1.58383	16	emb-27
emb-27.rep2	JU312	-1.4114	16	emb-27
emb-27.rep2	AB1	-1.62571	16	emb-27
emb-27.rep2	MY1	-0.863209	16	emb-27
emb-27.rep2	JU775	-1.58766	16	emb-27
emb-27.rep2	ED3057	-1.58363	16	emb-27
emb-27.rep2	JU322	-1.54398	16	emb-27
emb-27.rep2	JU642	-1.09269	16	emb-27
emb-27.rep2	CB4856	-0.306159	16	emb-27
emb-27.rep2	MY6	-1.46466	16	emb-27
emb-27.rep2	GXW1	-1.44357	16	emb-27
emb-27.rep2	JU360	-0.849318	16	emb-27
emb-27.rep2	VC20019	-0.410532	16	emb-27
emb-27.rep2	LKC34	-0.615704	16	emb-27
emb-27.rep2	ED3021	-0.800895	16	emb-27
emb-27.rep2	PX174	-0.00104235	16	emb-27
emb-27.rep2	MY14	-0.974934	16	emb-27
emb-27.rep2	ED3017	-0.620741	16	emb-27
emb-27.rep2	JU1652	-0.166948	16	emb-27
emb-27.rep2	JU397	-1.65286	16	emb-27
emb-27.rep2	JU533	-0.341547	16	emb-27
emb-27.rep2	ED3052	0.678928	16	emb-27
emb-27.rep2	JU1400	-1.73723	16	emb-27
emb-27.rep2	ED3042	-1.54246	16	emb-27
emb-27.rep2	ED3040	-0.412144	16	emb-27
emb-27.rep2	JU300	-1.67884	16	emb-27
fath-1.rep1	MY2	-0.942536	3	fath-1
fath-1.rep1	JU1400	-0.204961	3	fath-1
fath-1.rep1	JU312	-0.136044	3	fath-1
fath-1.rep1	AB1	-0.585447	3	fath-1
fath-1.rep1	JU642	-0.369761	3	fath-1
fath-1.rep1	JU775	0.368164	3	fath-1
fath-1.rep1	ED3021	-0.123776	3	fath-1
fath-1.rep1	JU322	-0.727253	3	fath-1
fath-1.rep1	AB3	-0.469047	3	fath-1
fath-1.rep1	PX174	-0.502976	3	fath-1
fath-1.rep1	JU1652	0.479804	3	fath-1
fath-1.rep1	JU360	-1.40288	3	fath-1
fath-1.rep1	MY6	-0.424577	3	fath-1
fath-1.rep1	LKC34	-0.456185	3	fath-1
fath-1.rep1	ED3042	-1.01671	3	fath-1
fath-1.rep1	GXW1	0.203964	3	fath-1
fath-1.rep1	CB4854	0.377997	3	fath-1
fath-1.rep1	CB4856	-0.460202	3	fath-1
fath-1.rep1	JU300	-0.858913	3	fath-1
fath-1.rep1	ED3040	-0.0551357	3	fath-1
fath-1.rep1	JU397	-0.417531	3	fath-1
fath-1.rep1	VC20019	-0.531544	3	fath-1
fath-1.rep1	ED3052	0.0966586	3	fath-1
fath-1.rep1	ED3057	-1.42446	3	fath-1
fath-1.rep1	MY14	-0.961469	3	fath-1
fath-1.rep1	ED3017	-0.891463	3	fath-1
fath-1.rep1	JU533	0.11758	3	fath-1
fath-1.rep1	MY1	-0.681719	3	fath-1
fath-1.rep2	JU312	-0.100516	4	fath-1
fath-1.rep2	AB3	-0.383374	4	fath-1
fath-1.rep2	MY2	-0.926962	4	fath-1
fath-1.rep2	CB4856	-0.661826	4	fath-1
fath-1.rep2	JU642	-0.137431	4	fath-1
fath-1.rep2	JU322	-0.568367	4	fath-1
fath-1.rep2	AB1	-0.418854	4	fath-1
fath-1.rep2	MY6	-1.00576	4	fath-1
fath-1.rep2	ED3017	-0.867977	4	fath-1
fath-1.rep2	JU360	-1.31008	4	fath-1
fath-1.rep2	CB4854	0.361005	4	fath-1
fath-1.rep2	LKC34	0.0438833	4	fath-1
fath-1.rep2	PX174	-0.100832	4	fath-1
fath-1.rep2	JU1400	-0.278216	4	fath-1
fath-1.rep2	JU397	-0.507539	4	fath-1
fath-1.rep2	JU533	0.0847453	4	fath-1
fath-1.rep2	MY14	-0.658207	4	fath-1
fath-1.rep2	JU775	0.338718	4	fath-1
fath-1.rep2	ED3021	-0.112498	4	fath-1
fath-1.rep2	GXW1	0.0699271	4	fath-1
fath-1.rep2	ED3057	-1.42628	4	fath-1
fath-1.rep2	VC20019	-0.703984	4	fath-1
fath-1.rep2	JU1652	0.385179	4	fath-1
fath-1.rep2	ED3040	-0.035583	4	fath-1
fath-1.rep2	MY1	-0.484666	4	fath-1
fath-1.rep2	ED3042	-1.00224	4	fath-1
fath-1.rep2	JU300	-0.90564	4	fath-1
fath-1.rep2	ED3052	0.29483	4	fath-1
GFP.rep1	AB3	-0.29107	19	Control
GFP.rep1	ED3017	0.0894275	19	Control
GFP.rep1	JU322	-0.722087	19	Control
GFP.rep1	CB4856	-0.455642	19	Control
GFP.rep1	MY1	-0.255387	19	Control
GFP.rep1	JU397	-0.397352	19	Control
GFP.rep1	JU533	-0.278545	19	Control
GFP.rep1	JU642	0.143131	19	Control
GFP.rep1	ED3040	-0.305094	19	Control
GFP.rep1	ED3021	0.0774572	19	Control
GFP.rep1	JU312	-0.139913	19	Control
GFP.rep1	JU775	-0.28864	19	Control
GFP.rep1	MY6	-0.134903	19	Control
GFP.rep1	MY2	-0.0604133	19	Control
GFP.rep1	AB1	-0.0191244	19	Control
GFP.rep1	JU360	-0.146085	19	Control
GFP.rep1	LKC34	0.190557	19	Control
GFP.rep1	ED3042	-0.0161156	19	Control
GFP.rep1	CB4854	-0.0287759	19	Control
GFP.rep1	ED3057	-0.928612	19	Control
GFP.rep1	GXW1	0.327896	19	Control
GFP.rep1	PX174	0.255226	19	Control
GFP.rep1	JU1400	-0.252363	19	Control
GFP.rep1	JU1652	0.138189	19	Control
GFP.rep1	JU300	-0.314394	19	Control
GFP.rep1	MY14	-0.0244905	19	Control
GFP.rep1	ED3052	0.132624	19	Control
GFP.rep1	VC20019	-0.138473	19	Control
GFP.rep2	JU322	-0.471031	20	Control
GFP.rep2	JU360	-0.207456	20	Control
GFP.rep2	JU312	-0.345992	20	Control
GFP.rep2	ED3017	0.125745	20	Control
GFP.rep2	MY1	-0.204018	20	Control
GFP.rep2	JU397	-0.166693	20	Control
GFP.rep2	JU533	-0.632801	20	Control
GFP.rep2	AB1	0.114856	20	Control
GFP.rep2	ED3021	-0.00628015	20	Control
GFP.rep2	MY2	-0.0274713	20	Control
GFP.rep2	AB3	-0.233487	20	Control
GFP.rep2	JU642	0.123918	20	Control
GFP.rep2	ED3040	-0.251957	20	Control
GFP.rep2	MY6	-0.226368	20	Control
GFP.rep2	ED3057	-0.582232	20	Control
GFP.rep2	CB4854	-0.0577976	20	Control
GFP.rep2	CB4856	-0.334237	20	Control
GFP.rep2	ED3042	0.00548534	20	Control
GFP.rep2	JU1400	-0.13778	20	Control
GFP.rep2	JU775	-0.183276	20	Control
GFP.rep2	LKC34	0.165022	20	Control
GFP.rep2	PX174	0.303668	20	Control
GFP.rep2	JU1652	0.173899	20	Control
GFP.rep2	GXW1	0.272627	20	Control
GFP.rep2	MY14	0.0174584	20	Control
GFP.rep2	ED3052	0.0979381	20	Control
GFP.rep2	JU300	-0.359019	20	Control
GFP.rep2	VC20019	-0.112592	20	Control
gld-1.rep1	JU775	-0.624159	9	gld-1
gld-1.rep1	ED3040	-0.19782	9	gld-1
gld-1.rep1	AB1	-0.375233	9	gld-1
gld-1.rep1	ED3021	-0.206184	9	gld-1
gld-1.rep1	JU397	-0.198474	9	gld-1
gld-1.rep1	MY14	-0.267669	9	gld-1
gld-1.rep1	JU360	-0.603479	9	gld-1
gld-1.rep1	JU312	-0.28322	9	gld-1
gld-1.rep1	CB4856	-0.581346	9	gld-1
gld-1.rep1	CB4854	-0.0303621	9	gld-1
gld-1.rep1	ED3042	-0.0529421	9	gld-1
gld-1.rep1	LKC34	0.150946	9	gld-1
gld-1.rep1	JU642	-0.00511329	9	gld-1
gld-1.rep1	ED3052	0.245465	9	gld-1
gld-1.rep1	JU533	-0.11843	9	gld-1
gld-1.rep1	AB3	-0.480121	9	gld-1
gld-1.rep1	JU322	-0.69848	9	gld-1
gld-1.rep1	ED3017	0.12491	9	gld-1
gld-1.rep1	ED3057	-0.617258	9	gld-1
gld-1.rep1	MY1	-0.507113	9	gld-1
gld-1.rep1	MY2	-0.140313	9	gld-1
gld-1.rep1	JU300	-0.370163	9	gld-1
gld-1.rep1	JU1400	-0.618867	9	gld-1
gld-1.rep1	MY6	-0.46224	9	gld-1
gld-1.rep1	GXW1	0.416876	9	gld-1
gld-1.rep1	PX174	0.329846	9	gld-1
gld-1.rep1	VC20019	-0.448172	9	gld-1
gld-1.rep1	JU1652	-0.0666367	9	gld-1
gld-1.rep2	ED3040	-0.171114	10	gld-1
gld-1.rep2	ED3052	0.242511	10	gld-1
gld-1.rep2	JU397	-0.247139	10	gld-1
gld-1.rep2	JU775	-0.610862	10	gld-1
gld-1.rep2	MY1	-0.49136	10	gld-1
gld-1.rep2	CB4856	-0.539915	10	gld-1
gld-1.rep2	ED3057	-0.65771	10	gld-1
gld-1.rep2	AB1	-0.398977	10	gld-1
gld-1.rep2	JU642	0.0387363	10	gld-1
gld-1.rep2	MY2	-0.148383	10	gld-1
gld-1.rep2	ED3017	0.0945259	10	gld-1
gld-1.rep2	MY14	-0.303827	10	gld-1
gld-1.rep2	JU312	-0.290443	10	gld-1
gld-1.rep2	JU322	-0.725738	10	gld-1
gld-1.rep2	JU1400	-0.595115	10	gld-1
gld-1.rep2	CB4854	0.00841324	10	gld-1
gld-1.rep2	ED3021	-0.218272	10	gld-1
gld-1.rep2	MY6	-0.407903	10	gld-1
gld-1.rep2	PX174	0.336783	10	gld-1
gld-1.rep2	GXW1	0.421894	10	gld-1
gld-1.rep2	JU360	-0.589785	10	gld-1
gld-1.rep2	LKC34	0.152443	10	gld-1
gld-1.rep2	JU1652	-0.0798119	10	gld-1
gld-1.rep2	ED3042	-0.0221836	10	gld-1
gld-1.rep2	AB3	-0.482497	10	gld-1
gld-1.rep2	VC20019	-0.409552	10	gld-1
gld-1.rep2	JU533	-0.175762	10	gld-1
gld-1.rep2	JU300	-0.376551	10	gld-1
his-69.rep1	AB1	0.019345	1	his-69
his-69.rep1	JU312	-0.245233	1	his-69
his-69.rep1	MY2	-0.0834048	1	his-69
his-69.rep1	JU300	-0.210901	1	his-69
his-69.rep1	JU1400	-0.211549	1	his-69
his-69.rep1	MY6	-0.0258349	1	his-69
his-69.rep1	JU642	-0.214387	1	his-69
his-69.rep1	ED3052	0.144568	1	his-69
his-69.rep1	MY14	-0.0461996	1	his-69
his-69.rep1	ED3021	0.198175	1	his-69
his-69.rep1	JU322	-0.531455	1	his-69
his-69.rep1	ED3017	0.264346	1	his-69
his-69.rep1	CB4854	0.032225	1	his-69
his-69.rep1	JU360	-0.699292	1	his-69
his-69.rep1	GXW1	0.130067	1	his-69
his-69.rep1	JU775	-0.15674	1	his-69
his-69.rep1	ED3057	-0.380494	1	his-69
his-69.rep1	VC20019	-0.171873	1	his-69
his-69.rep1	LKC34	0.0238643	1	his-69
his-69.rep1	PX174	0.176026	1	his-69
his-69.rep1	ED3042	-0.198993	1	his-69
his-69.rep1	AB3	-0.309928	1	his-69
his-69.rep1	ED3040	-0.235015	1	his-69
his-69.rep1	JU533	-0.176804	1	his-69
his-69.rep1	JU1652	0.396903	1	his-69
his-69.rep1	JU397	-0.246561	1	his-69
his-69.rep1	MY1	-0.270101	1	his-69
his-69.rep1	CB4856	-0.676975	1	his-69
his-69.rep2	AB1	-0.0365434	2	his-69
his-69.rep2	JU642	-0.173607	2	his-69
his-69.rep2	CB4854	0.166626	2	his-69
his-69.rep2	AB3	-0.294647	2	his-69
his-69.rep2	JU322	-0.474906	2	his-69
his-69.rep2	PX174	0.292667	2	his-69
his-69.rep2	MY2	-0.229498	2	his-69
his-69.rep2	MY6	-0.086016	2	his-69
his-69.rep2	LKC34	0.205963	2	his-69
his-69.rep2	JU775	-0.413815	2	his-69
his-69.rep2	JU312	-0.0483694	2	his-69
his-69.rep2	JU360	-0.493851	2	his-69
his-69.rep2	JU397	-0.146367	2	his-69
his-69.rep2	CB4856	-0.340554	2	his-69
his-69.rep2	JU1400	-0.115618	2	his-69
his-69.rep2	GXW1	0.226045	2	his-69
his-69.rep2	ED3040	-0.163722	2	his-69
his-69.rep2	VC20019	0.0839881	2	his-69
his-69.rep2	ED3042	-0.226712	2	his-69
his-69.rep2	ED3021	0.0795441	2	his-69
his-69.rep2	JU300	-0.241095	2	his-69
his-69.rep2	MY14	-0.255176	2	his-69
his-69.rep2	ED3017	0.19967	2	his-69
his-69.rep2	JU1652	0.281857	2	his-69
his-69.rep2	ED3057	-0.434397	2	his-69
his-69.rep2	JU533	-0.100084	2	his-69
his-69.rep2	MY1	-0.339489	2	his-69
his-69.rep2	ED3052	0.00525224	2	his-69
HT115.rep1	JU533	-0.476277	21	Control
HT115.rep1	JU312	-0.243966	21	Control
HT115.rep1	JU642	0.186397	21	Control
HT115.rep1	ED3021	-0.00503363	21	Control
HT115.rep1	JU322	-0.297308	21	Control
HT115.rep1	AB3	-0.251371	21	Control
HT115.rep1	ED3017	-0.0602486	21	Control
HT115.rep1	AB1	-0.0276403	21	Control
HT115.rep1	MY1	-0.129918	21	Control
HT115.rep1	JU775	-0.25119	21	Control
HT115.rep1	ED3040	-0.394404	21	Control
HT115.rep1	ED3042	0.0597478	21	Control
HT115.rep1	ED3052	0.0691692	21	Control
HT115.rep1	JU360	-0.307803	21	Control
HT115.rep1	CB4854	0.0875637	21	Control
HT115.rep1	MY6	-0.27346	21	Control
HT115.rep1	PX174	0.363687	21	Control
HT115.rep1	JU397	-0.370289	21	Control
HT115.rep1	LKC34	0.241209	21	Control
HT115.rep1	MY14	-0.15674	21	Control
HT115.rep1	JU300	-0.456739	21	Control
HT115.rep1	MY2	-0.236527	21	Control
HT115.rep1	CB4856	-0.63622	21	Control
HT115.rep1	GXW1	0.332341	21	Control
HT115.rep1	VC20019	-0.127118	21	Control
HT115.rep1	ED3057	-0.398105	21	Control
HT115.rep1	JU1652	0.027902	21	Control
HT115.rep1	JU1400	-0.199317	21	Control
HT115.rep2	JU533	-0.278927	22	Control
HT115.rep2	JU312	-0.22269	22	Control
HT115.rep2	JU642	0.28172	22	Control
HT115.rep2	JU322	-0.325577	22	Control
HT115.rep2	JU360	-0.0272039	22	Control
HT115.rep2	AB3	-0.0819894	22	Control
HT115.rep2	ED3017	0.0725899	22	Control
HT115.rep2	MY1	-0.0538599	22	Control
HT115.rep2	ED3057	-0.34175	22	Control
HT115.rep2	JU775	-0.380098	22	Control
HT115.rep2	ED3040	-0.0287049	22	Control
HT115.rep2	ED3021	0.167088	22	Control
HT115.rep2	MY2	-0.303774	22	Control
HT115.rep2	JU397	-0.338782	22	Control
HT115.rep2	CB4854	-0.0704864	22	Control
HT115.rep2	AB1	0.138864	22	Control
HT115.rep2	PX174	0.374408	22	Control
HT115.rep2	GXW1	0.0432441	22	Control
HT115.rep2	LKC34	0.0711679	22	Control
HT115.rep2	ED3042	0.1247	22	Control
HT115.rep2	ED3052	-0.163603	22	Control
HT115.rep2	MY6	-0.149665	22	Control
HT115.rep2	JU1400	-0.160047	22	Control
HT115.rep2	CB4856	-0.347277	22	Control
HT115.rep2	VC20019	-0.0619457	22	Control
HT115.rep2	JU1652	0.1546	22	Control
HT115.rep2	MY14	-0.161079	22	Control
HT115.rep2	JU300	-0.36078	22	Control
HT115.rep3	JU642	0.232377	23	Control
HT115.rep3	JU312	-0.37521	23	Control
HT115.rep3	JU775	-0.240274	23	Control
HT115.rep3	ED3017	0.0542532	23	Control
HT115.rep3	LKC34	0.29179	23	Control
HT115.rep3	JU322	-0.563436	23	Control
HT115.rep3	AB1	0.0277378	23	Control
HT115.rep3	JU533	-0.441039	23	Control
HT115.rep3	JU397	-0.272176	23	Control
HT115.rep3	MY14	-0.220172	23	Control
HT115.rep3	ED3042	0.00671896	23	Control
HT115.rep3	ED3021	-0.0263086	23	Control
HT115.rep3	ED3057	-0.479209	23	Control
HT115.rep3	GXW1	0.31038	23	Control
HT115.rep3	JU360	-0.29592	23	Control
HT115.rep3	AB3	-0.432194	23	Control
HT115.rep3	ED3040	-0.37113	23	Control
HT115.rep3	MY6	-0.223805	23	Control
HT115.rep3	JU1400	-0.536686	23	Control
HT115.rep3	MY1	-0.352353	23	Control
HT115.rep3	CB4854	-0.081047	23	Control
HT115.rep3	VC20019	-0.130323	23	Control
HT115.rep3	JU1652	-0.0703401	23	Control
HT115.rep3	ED3052	0.134197	23	Control
HT115.rep3	MY2	-0.227743	23	Control
HT115.rep3	CB4856	-0.409586	23	Control
HT115.rep3	PX174	0.413903	23	Control
HT115.rep3	JU300	-0.507496	23	Control
HT115.rep4	ED3017	-0.000964918	24	Control
HT115.rep4	ED3057	-0.491118	24	Control
HT115.rep4	MY1	-0.136432	24	Control
HT115.rep4	ED3021	-0.0296425	24	Control
HT115.rep4	JU533	-0.236073	24	Control
HT115.rep4	JU642	0.189888	24	Control
HT115.rep4	AB1	-0.0824066	24	Control
HT115.rep4	GXW1	0.285025	24	Control
HT115.rep4	LKC34	0.278831	24	Control
HT115.rep4	JU312	-0.310877	24	Control
HT115.rep4	MY2	-0.155396	24	Control
HT115.rep4	MY6	-0.24117	24	Control
HT115.rep4	JU397	-0.313965	24	Control
HT115.rep4	JU775	-0.184651	24	Control
HT115.rep4	ED3040	-0.235298	24	Control
HT115.rep4	CB4854	0.0870298	24	Control
HT115.rep4	JU1400	-0.361856	24	Control
HT115.rep4	JU322	-0.387975	24	Control
HT115.rep4	AB3	-0.273497	24	Control
HT115.rep4	PX174	0.379901	24	Control
HT115.rep4	JU1652	-0.048106	24	Control
HT115.rep4	MY14	0.0485623	24	Control
HT115.rep4	ED3042	-0.0124052	24	Control
HT115.rep4	ED3052	0.0916528	24	Control
HT115.rep4	VC20019	-0.0369219	24	Control
HT115.rep4	JU300	-0.243644	24	Control
HT115.rep4	JU360	-0.224048	24	Control
HT115.rep4	CB4856	-0.352039	24	Control
HT115.rep5	MY2	-0.34804	40	Control
HT115.rep5	ED3017	0.157206	40	Control
HT115.rep5	GXW1	-0.0608048	40	Control
HT115.rep5	JU322	-0.28987	40	Control
HT115.rep5	ED3057	-0.346179	40	Control
HT115.rep5	LKC34	-0.289913	40	Control
HT115.rep5	PX174	0.14356	40	Control
HT115.rep5	JU775	-0.675482	40	Control
HT115.rep5	AB3	-0.149384	40	Control
HT115.rep5	ED3040	0.0786251	40	Control
HT115.rep5	AB1	0.325462	40	Control
HT115.rep5	JU533	-0.318724	40	Control
HT115.rep5	ED3042	0.221062	40	Control
HT115.rep5	JU397	-0.564264	40	Control
HT115.rep5	JU1400	-0.0299176	40	Control
HT115.rep5	MY6	-0.298242	40	Control
HT115.rep5	MY1	0.0723114	40	Control
HT115.rep5	JU1652	-0.0597122	40	Control
HT115.rep5	MY14	-0.227267	40	Control
HT115.rep5	ED3021	0.0682118	40	Control
HT115.rep5	JU642	0.403522	40	Control
HT115.rep5	ED3052	-0.171161	40	Control
HT115.rep5	CB4854	-0.101694	40	Control
HT115.rep5	JU360	-0.0971447	40	Control
HT115.rep5	JU312	-0.380928	40	Control
HT115.rep5	CB4856	-0.351321	40	Control
HT115.rep5	JU300	-0.174752	40	Control
HT115.rep5	VC20019	-0.482587	40	Control
mdh-2.rep1	JU312	-0.157108	11	mdh-2
mdh-2.rep1	LKC34	0.170034	11	mdh-2
mdh-2.rep1	JU775	-0.146554	11	mdh-2
mdh-2.rep1	JU360	-0.45321	11	mdh-2
mdh-2.rep1	JU642	0.0149891	11	mdh-2
mdh-2.rep1	ED3057	-0.826319	11	mdh-2
mdh-2.rep1	GXW1	0.0273642	11	mdh-2
mdh-2.rep1	JU322	-0.349093	11	mdh-2
mdh-2.rep1	MY1	-0.127276	11	mdh-2
mdh-2.rep1	ED3021	0.11984	11	mdh-2
mdh-2.rep1	AB3	-0.559019	11	mdh-2
mdh-2.rep1	MY14	-0.201246	11	mdh-2
mdh-2.rep1	ED3040	0.0493944	11	mdh-2
mdh-2.rep1	AB1	-0.242056	11	mdh-2
mdh-2.rep1	JU1400	-0.473306	11	mdh-2
mdh-2.rep1	JU397	-0.209334	11	mdh-2
mdh-2.rep1	CB4854	0.212265	11	mdh-2
mdh-2.rep1	MY2	-0.432863	11	mdh-2
mdh-2.rep1	ED3052	-0.0212149	11	mdh-2
mdh-2.rep1	JU1652	0.361934	11	mdh-2
mdh-2.rep1	JU533	0.0544538	11	mdh-2
mdh-2.rep1	ED3042	0.0235539	11	mdh-2
mdh-2.rep1	ED3017	0.228084	11	mdh-2
mdh-2.rep1	VC20019	-0.106931	11	mdh-2
mdh-2.rep1	JU300	-0.252615	11	mdh-2
mdh-2.rep1	CB4856	-0.187701	11	mdh-2
mdh-2.rep1	PX174	0.308424	11	mdh-2
mdh-2.rep1	MY6	-0.320709	11	mdh-2
mdh-2.rep2	MY2	-0.419998	12	mdh-2
mdh-2.rep2	ED3057	-0.63892	12	mdh-2
mdh-2.rep2	MY1	-0.507734	12	mdh-2
mdh-2.rep2	ED3040	-0.023649	12	mdh-2
mdh-2.rep2	AB1	-0.25558	12	mdh-2
mdh-2.rep2	GXW1	0.197438	12	mdh-2
mdh-2.rep2	JU642	0.24165	12	mdh-2
mdh-2.rep2	JU322	-0.505862	12	mdh-2
mdh-2.rep2	JU1400	-0.294355	12	mdh-2
mdh-2.rep2	ED3021	0.0576157	12	mdh-2
mdh-2.rep2	JU312	-0.147695	12	mdh-2
mdh-2.rep2	MY6	-0.410426	12	mdh-2
mdh-2.rep2	ED3042	0.0311813	12	mdh-2
mdh-2.rep2	AB3	-0.523135	12	mdh-2
mdh-2.rep2	JU775	-0.146094	12	mdh-2
mdh-2.rep2	LKC34	0.0233639	12	mdh-2
mdh-2.rep2	CB4854	0.103486	12	mdh-2
mdh-2.rep2	JU1652	0.333077	12	mdh-2
mdh-2.rep2	JU300	-0.393835	12	mdh-2
mdh-2.rep2	JU360	-0.483804	12	mdh-2
mdh-2.rep2	PX174	0.269474	12	mdh-2
mdh-2.rep2	VC20019	-0.244563	12	mdh-2
mdh-2.rep2	MY14	-0.528103	12	mdh-2
mdh-2.rep2	ED3052	0.100354	12	mdh-2
mdh-2.rep2	ED3017	0.232522	12	mdh-2
mdh-2.rep2	JU397	-0.252591	12	mdh-2
mdh-2.rep2	CB4856	-0.684054	12	mdh-2
mdh-2.rep2	JU533	0.156289	12	mdh-2
ZK686.3.rep1	JU312	-0.656429	17	ZK686.3
ZK686.3.rep1	ED3057	-1.36843	17	ZK686.3
ZK686.3.rep1	AB1	-0.949305	17	ZK686.3
ZK686.3.rep1	PX174	0.469929	17	ZK686.3
ZK686.3.rep1	JU775	-0.8512	17	ZK686.3
ZK686.3.rep1	JU322	-0.966331	17	ZK686.3
ZK686.3.rep1	ED3040	-0.0525807	17	ZK686.3
ZK686.3.rep1	JU1400	-0.892988	17	ZK686.3
ZK686.3.rep1	JU397	-0.882505	17	ZK686.3
ZK686.3.rep1	AB3	-1.44374	17	ZK686.3
ZK686.3.rep1	CB4854	0.29468	17	ZK686.3
ZK686.3.rep1	MY14	-0.45489	17	ZK686.3
ZK686.3.rep1	MY6	-0.712737	17	ZK686.3
ZK686.3.rep1	JU360	-0.879496	17	ZK686.3
ZK686.3.rep1	JU1652	0.524257	17	ZK686.3
ZK686.3.rep1	JU300	-0.926945	17	ZK686.3
ZK686.3.rep1	ED3021	-0.312247	17	ZK686.3
ZK686.3.rep1	MY1	-0.687145	17	ZK686.3
ZK686.3.rep1	CB4856	-0.292856	17	ZK686.3
ZK686.3.rep1	ED3052	0.102974	17	ZK686.3
ZK686.3.rep1	VC20019	-0.0628575	17	ZK686.3
ZK686.3.rep1	JU533	-0.0114844	17	ZK686.3
ZK686.3.rep1	MY2	-1.00581	17	ZK686.3
ZK686.3.rep1	ED3017	-0.222809	17	ZK686.3
ZK686.3.rep1	ED3042	-0.977449	17	ZK686.3
ZK686.3.rep1	GXW1	-0.485422	17	ZK686.3
ZK686.3.rep1	JU642	-0.932751	17	ZK686.3
ZK686.3.rep1	LKC34	-0.649386	17	ZK686.3
ZK686.3.rep2	JU322	-1.51286	18	ZK686.3
ZK686.3.rep2	AB1	-0.955948	18	ZK686.3
ZK686.3.rep2	AB3	-1.41136	18	ZK686.3
ZK686.3.rep2	JU397	-0.902861	18	ZK686.3
ZK686.3.rep2	CB4854	0.670433	18	ZK686.3
ZK686.3.rep2	JU360	-1.29272	18	ZK686.3
ZK686.3.rep2	JU312	-0.628964	18	ZK686.3
ZK686.3.rep2	CB4856	-0.625582	18	ZK686.3
ZK686.3.rep2	ED3017	-0.463086	18	ZK686.3
ZK686.3.rep2	JU533	-0.51552	18	ZK686.3
ZK686.3.rep2	MY1	-0.958777	18	ZK686.3
ZK686.3.rep2	JU1652	0.117974	18	ZK686.3
ZK686.3.rep2	PX174	0.149516	18	ZK686.3
ZK686.3.rep2	ED3057	-1.46859	18	ZK686.3
ZK686.3.rep2	JU642	-1.04416	18	ZK686.3
ZK686.3.rep2	ED3052	-0.18444	18	ZK686.3
ZK686.3.rep2	ED3040	-0.145879	18	ZK686.3
ZK686.3.rep2	JU775	-0.814524	18	ZK686.3
ZK686.3.rep2	MY6	-0.701253	18	ZK686.3
ZK686.3.rep2	MY2	-0.755743	18	ZK686.3
ZK686.3.rep2	JU300	-0.932804	18	ZK686.3
ZK686.3.rep2	JU1400	-1.43651	18	ZK686.3
ZK686.3.rep2	ED3021	-0.629958	18	ZK686.3
ZK686.3.rep2	GXW1	-0.615014	18	ZK686.3
ZK686.3.rep2	MY14	-0.717769	18	ZK686.3
ZK686.3.rep2	VC20019	-0.343392	18	ZK686.3
ZK686.3.rep2	LKC34	-0.587365	18	ZK686.3
ZK686.3.rep2	ED3042	-0.914903	18	ZK686.3

## Sheet: ED3052.mapping.unique.alleles
allele	strain	chr	pos	wt_dna	mut_dna	feature	gene	CGC	effect	wt_prot	mut_prot	Grantham	GERP	phyloP	phastCons	cds	aa_pos	domain_affected
cewivar00829620	ED3052	III	149449	13N	13N	coding_exon	T17A3.8	ver-2	complex_change			NA	NA	NA	NA	T17A3.8	66	Pkinase_Tyr,PFAM;Pkinase,PFAM
cewivar00377312	ED3052	III	152969	C	A	coding_exon	T17A3.9	T17A3.9	missense	L	F	22	NA	NA	NA	T17A3.9	68
cewivar00377323	ED3052	III	941480	T	C	coding_exon	T12B5.8	fbxa-59	missense	K	E	56	NA	NA	NA	T12B5.8	131
cewivar00356966	ED3052	III	952024	A	G	coding_exon	T12B5.4	fbxa-11	missense	N	S	46	NA	NA	NA	T12B5.4	286
cewivar00829636	ED3052	III	973897	3N	3N	coding_exon	R06B10.2	R06B10.2	complex_change			NA	NA	NA	NA	R06B10.2	883	PTPc,SMART
cewivar00377349	ED3052	III	977758	C	A	coding_exon	R06B10.2	R06B10.2	missense	M	F	28	NA	NA	NA	R06B10.2	260
cewivar00377350	ED3052	III	977760	T	A	coding_exon	R06B10.2	R06B10.2	missense	M	F	28	NA	NA	NA	R06B10.2	260
cewivar00377933	ED3052	III	1983921	C	G	coding_exon	Y39A3B.7	Y39A3B.7	missense	G	A	60	NA	NA	NA	Y39A3B.7	73	transmembrane_domain,INTRINSIC
cewivar00735413	ED3052	III	3054168	ATG	A	coding_exon	H06I04.5	H06I04.5	deletion, frame_shift			NA	NA	NA	NA	H06I04.5	418
cewivar00829720	ED3052	III	3055100	41N	36N	coding_exon	H06I04.5	H06I04.5	complex_change, frame_shift			NA	NA	NA	NA	H06I04.5	572
cewivar00378605	ED3052	III	3081169	G	A	coding_exon	H06I04.3	H06I04.3	missense	E	K	56	2.33	1.515	0.837	H06I04.3a	561	Spb1_C,PFAM
cewivar00377309	ED3052	III	42855	T	G	intergenic						NA	NA	NA	NA		NA
cewivar00377310	ED3052	III	64535	A	C	intron	W05G11.6	W05G11.6				NA	NA	NA	NA		NA
cewivar00735003	ED3052	III	90798	AT	A	intron	C29F9.7	pat-4	deletion			NA	NA	NA	NA		NA
cewivar00735006	ED3052	III	94439	AT	A	intron	C29F9.7	pat-4	deletion			NA	NA	NA	NA		NA
cewivar00377313	ED3052	III	210409	G	A	intergenic						NA	NA	NA	NA		NA
cewivar00735007	ED3052	III	213332	CA	C	intergenic			deletion			NA	NA	NA	NA		NA
cewivar00377315	ED3052	III	623773	A	T	intergenic						NA	NA	NA	NA		NA
cewivar00829622	ED3052	III	661539	7N	6N	intergenic			complex_change			NA	NA	NA	NA		NA
cewivar00377317	ED3052	III	692074	C	T	intron	C24A1.2	elf-1				NA	NA	NA	NA		NA
cewivar00735011	ED3052	III	867293	A	AT	intergenic			insertion			NA	NA	NA	NA		NA
cewivar00377322	ED3052	III	936600	C	T	intergenic						NA	NA	NA	NA		NA
cewivar00377324	ED3052	III	942371	G	A	intron	T12B5.8	fbxa-59				NA	NA	NA	NA		NA
cewivar00377328	ED3052	III	948738	A	G	intron	T12B5.13	fbxa-23				NA	NA	NA	NA		NA
cewivar00377341	ED3052	III	963867	C	A	intergenic						NA	NA	NA	NA		NA
cewivar00377343	ED3052	III	966636	C	A	intergenic						NA	NA	NA	NA		NA
cewivar00829638	ED3052	III	979382	16N	16N	intergenic			complex_change			NA	NA	NA	NA		NA
cewivar00377351	ED3052	III	979391	G	A	intron	R06B10.5	tbc-10				NA	NA	NA	NA		NA
cewivar00377352	ED3052	III	979395	C	T	intron	R06B10.5	tbc-10				NA	NA	NA	NA		NA
cewivar00377353	ED3052	III	980811	T	C	intron	R06B10.5	tbc-10				NA	NA	NA	NA		NA
cewivar00377355	ED3052	III	986237	T	A	intron	R06B10.5	tbc-10				NA	NA	NA	NA		NA
cewivar00735021	ED3052	III	1005031	AT	A	intron	R06B10.3	clec-150	deletion			NA	NA	NA	NA		NA
cewivar00377361	ED3052	III	1139655	G	A	intron	Y71D11A.3	Y71D11A.3				NA	NA	NA	NA		NA
cewivar00377362	ED3052	III	1209529	A	T	intron	Y119D3B.11	orc-3				NA	NA	NA	NA		NA
cewivar00735026	ED3052	III	1220226	C	CT	intron	Y119D3B.17	pes-4	insertion			NA	NA	NA	NA		NA
cewivar00377364	ED3052	III	1239862	G	A	intron	Y119D3B.8	fbxa-61				NA	NA	NA	NA		NA
cewivar00829641	ED3052	III	1251542	17N	17N	intergenic			complex_change			NA	NA	NA	NA		NA
cewivar00735028	ED3052	III	1267625	T	TTATA	intron	ZC47.6	fbxa-32	insertion			NA	NA	NA	NA		NA
cewivar00377389	ED3052	III	1339786	G	A	intron	Y82E9BL.8	fbxa-5				NA	NA	NA	NA		NA
cewivar00829644	ED3052	III	1345445	4N		intergenic			deletion			NA	NA	NA	NA		NA
cewivar00735034	ED3052	III	1352685	TA	T	intron	Y82E9BL.2	Y82E9BL.2	deletion			NA	NA	NA	NA		NA
cewivar00377415	ED3052	III	1370015	T	A	intergenic						NA	NA	NA	NA		NA
cewivar00829648	ED3052	III	1379085	31N	56N	intergenic			complex_change			NA	NA	NA	NA		NA
cewivar00377466	ED3052	III	1444755	A	G	intergenic						NA	NA	NA	NA		NA
cewivar00735058	ED3052	III	1471561	TA	T	intron	Y82E9BR.18	Y82E9BR.18	deletion			NA	NA	NA	NA		NA
cewivar00735062	ED3052	III	1484076	A+18N	A	intergenic			deletion			NA	NA	NA	NA		NA
cewivar00377486	ED3052	III	1484543	A	T	intergenic						NA	2.26	1.036	0.991		NA
cewivar00377488	ED3052	III	1484896	G	A	intergenic						NA	NA	NA	NA		NA
cewivar00735063	ED3052	III	1489601	CA	C	intron	Y82E9BR.19	Y82E9BR.19	deletion			NA	NA	NA	NA		NA
cewivar00377490	ED3052	III	1489606	A	T	intron	Y82E9BR.19	Y82E9BR.19				NA	NA	NA	NA		NA
cewivar00377491	ED3052	III	1489635	A	G	intron	Y82E9BR.19	Y82E9BR.19				NA	NA	NA	NA		NA
cewivar00377496	ED3052	III	1494319	G	C	intron	Y82E9BR.19	Y82E9BR.19				NA	NA	NA	NA		NA
cewivar00377506	ED3052	III	1496974	G	A	intron	M01G5.1	M01G5.1				NA	NA	NA	NA		NA
cewivar00735069	ED3052	III	1498803	G	GA	intron	M01G5.1	M01G5.1	insertion			NA	NA	NA	NA		NA
cewivar00377514	ED3052	III	1508142	A	T	intron	M01G5.1	M01G5.1				NA	NA	NA	NA		NA
cewivar00377515	ED3052	III	1508143	A	T	intron	M01G5.1	M01G5.1				NA	NA	NA	NA		NA
cewivar00377523	ED3052	III	1526175	A	T	intron	M01G5.5	snf-6				NA	NA	0.686	0.712		NA
cewivar00735079	ED3052	III	1543700	T	TC	intergenic			insertion			NA	NA	NA	NA		NA
cewivar00735080	ED3052	III	1567543	T+22N	T	intron	Y67D2.2	Y67D2.2	deletion			NA	NA	NA	NA		NA
cewivar00829652	ED3052	III	1598216		27N	intergenic			insertion			NA	NA	NA	NA		NA
cewivar00735089	ED3052	III	1608207	G	GTT	intron	Y22D7AL.9	Y22D7AL.9	insertion			NA	NA	NA	NA		NA
cewivar00735092	ED3052	III	1616351	CA	C	intergenic			deletion			NA	NA	NA	NA		NA
cewivar00730777	ED3052	III	1616888	G	GA	intergenic			insertion			NA	NA	NA	NA		NA
cewivar00735093	ED3052	III	1621247	C	CG	intron	Y22D7AL.5	hsp-60	insertion			NA	NA	NA	NA		NA
cewivar00829654	ED3052	III	1630149	1N		intergenic			deletion			NA	NA	NA	NA		NA
cewivar00829656	ED3052	III	1636394	26N	23N	intergenic			complex_change			NA	NA	NA	NA		NA
cewivar00377606	ED3052	III	1669362	T	A	intergenic						NA	NA	NA	NA		NA
cewivar00377612	ED3052	III	1685888	C	T	intron	Y22D7AR.7	Y22D7AR.7				NA	NA	NA	NA		NA
cewivar00377626	ED3052	III	1738358	C	T	intergenic						NA	NA	NA	NA		NA
cewivar00735117	ED3052	III	1748892	CA	C	intergenic			deletion			NA	NA	NA	NA		NA
cewivar00735122	ED3052	III	1762957	G	GT	intergenic			insertion			NA	NA	NA	NA		NA
cewivar00829658	ED3052	III	1764059	27N	23N	intergenic			complex_change			NA	NA	NA	NA		NA
cewivar00735124	ED3052	III	1767945	T	TTA	intron	Y46E12A.4	tbx-43	insertion			NA	NA	NA	NA		NA
cewivar00377648	ED3052	III	1774779	T	A	intron	Y39A3CL.4	Y39A3CL.4				NA	NA	0	0.825		NA
cewivar00735133	ED3052	III	1802249	AT	A	intron	Y39A3CL.2	tag-168	deletion			NA	NA	NA	NA		NA
cewivar00829660	ED3052	III	1805445	11N	30N	intergenic			complex_change			NA	NA	NA	NA		NA
cewivar00735135	ED3052	III	1805982	TA	T	intron	Y39A3CL.2	tag-168	deletion			NA	NA	NA	NA		NA
cewivar00377671	ED3052	III	1813663	T	A	intron	Y39A3CL.5	clp-4				NA	NA	NA	NA		NA
cewivar00377679	ED3052	III	1826308	T	G	intron	Y39A3CL.7	Y39A3CL.7				NA	NA	NA	NA		NA
cewivar00377680	ED3052	III	1826563	C	T	intron	Y39A3CL.7	Y39A3CL.7				NA	NA	NA	NA		NA
cewivar00735138	ED3052	III	1834412	A	ATTT	intergenic			insertion			NA	NA	NA	NA		NA
cewivar00377691	ED3052	III	1834413	G	T	intergenic						NA	NA	-0.135	0.84		NA
cewivar00377693	ED3052	III	1836101	C	T	intron	Y39A3CL.1	Y39A3CL.1				NA	NA	NA	NA		NA
cewivar00735142	ED3052	III	1842365	A	AT	intron	Y39A3CL.1	Y39A3CL.1	insertion			NA	NA	NA	NA		NA
cewivar00377710	ED3052	III	1845673	A	T	intron	Y39A3CL.1	Y39A3CL.1				NA	NA	NA	NA		NA
cewivar00377711	ED3052	III	1845685	A	C	intron	Y39A3CL.1	Y39A3CL.1				NA	NA	NA	NA		NA
cewivar00377715	ED3052	III	1857390	A	G	intron	Y39A3CR.6	hlh-33				NA	0.0888	-0.054	0.103		NA
cewivar00377716	ED3052	III	1857391	G	A	intron	Y39A3CR.6	hlh-33				NA	-4.53	-0.002	0.069		NA
cewivar00377719	ED3052	III	1863312	T	A	intron	Y39A3CR.3	Y39A3CR.3				NA	NA	NA	NA		NA
cewivar00377720	ED3052	III	1863720	A	G	intron	Y39A3CR.3	Y39A3CR.3				NA	NA	NA	NA		NA
cewivar00735150	ED3052	III	1874268	A	AT	intron	Y39A3CR.3	Y39A3CR.3	insertion			NA	NA	NA	NA		NA
cewivar00735151	ED3052	III	1876685	T	TAA	intron	Y39A3CR.3	Y39A3CR.3	insertion			NA	NA	NA	NA		NA
cewivar00829669	ED3052	III	1919547	15N	15N	intergenic			complex_change			NA	NA	NA	NA		NA
cewivar00377851	ED3052	III	1928226	C	A	intron	F53A3.4	pqn-41				NA	NA	1.003	0.859		NA
cewivar00377852	ED3052	III	1928547	T	G	intron	F53A3.4	pqn-41				NA	NA	NA	NA		NA
cewivar00377871	ED3052	III	1934569	G	A	intron	F53A3.4	pqn-41				NA	1.88	1.314	0.986		NA
cewivar00377884	ED3052	III	1942124	T	A	intron	F53A3.1	F53A3.1				NA	NA	NA	NA		NA
cewivar00377885	ED3052	III	1942753	A	T	intron	F53A3.1	F53A3.1				NA	NA	NA	NA		NA
cewivar00377891	ED3052	III	1943864	T	A	intergenic						NA	NA	0.783	0.834		NA
cewivar00735185	ED3052	III	1957557	AT	A	intron	R155.1	mboa-6	deletion			NA	NA	NA	NA		NA
cewivar00377921	ED3052	III	1957564	A	C	intron	R155.1	mboa-6				NA	NA	0.741	0.915		NA
cewivar00377925	ED3052	III	1960704	A	G	intron	R155.1	mboa-6				NA	NA	0.741	0.905		NA
cewivar00377930	ED3052	III	1973287	T	G	coding_exon	R155.3	R155.3	synonymous	P	P	NA	NA	NA	NA	R155.3	727
cewivar00377943	ED3052	III	1991287	G	C	intergenic						NA	NA	NA	NA		NA
cewivar00377953	ED3052	III	2003839	C	T	intergenic						NA	NA	NA	NA		NA
cewivar00377955	ED3052	III	2010498	C	T	intron	Y39A3B.5	ckr-2				NA	NA	NA	NA		NA
cewivar00735200	ED3052	III	2029034	A	ATTTATGAG	intergenic			insertion			NA	NA	NA	NA		NA
cewivar00735204	ED3052	III	2038654	AT	A	intron	M01E10.2	dpy-1	deletion			NA	NA	NA	NA		NA
cewivar00806554	ED3052	III	2063019	130N		intergenic			deletion			NA	NA	NA	NA		NA
cewivar00377999	ED3052	III	2075608	C	T	intron	Y39A3A.4	Y39A3A.4				NA	NA	1.003	0.832		NA
cewivar00735223	ED3052	III	2113993	TA	T	intron	Y48G9A.11	Y48G9A.11	deletion			NA	NA	NA	NA		NA
cewivar00378037	ED3052	III	2122945	T	C	intergenic						NA	NA	-0.179	0.639		NA
cewivar00378057	ED3052	III	2132277	T	C	intergenic						NA	NA	NA	NA		NA
cewivar00378100	ED3052	III	2192730	A	T	intron	Y48G9A.3	gcn-1				NA	NA	0.741	0.942		NA
cewivar00378101	ED3052	III	2195887	A	G	intron	Y48G9A.3	gcn-1				NA	NA	NA	NA		NA
cewivar00735242	ED3052	III	2219412	CA	C	intron	C39B5.8	fbxa-8	deletion			NA	NA	NA	NA		NA
cewivar00829677	ED3052	III	2327419	26N	34N	intergenic			complex_change			NA	NA	NA	NA		NA
cewivar00378155	ED3052	III	2332573	G	A	intron	Y54F10BM.1	Y54F10BM.1				NA	NA	-0.243	0.153		NA
cewivar00378158	ED3052	III	2342457	T	C	intergenic						NA	NA	0.734	0.914		NA
cewivar00378159	ED3052	III	2342971	G	A	intergenic						NA	NA	0	0.455		NA
cewivar00735259	ED3052	III	2343271	C	CTTCT	intergenic			insertion			NA	NA	NA	NA		NA
cewivar00378170	ED3052	III	2355767	G	A	intron	H04J21.3	gip-1				NA	NA	NA	NA		NA
cewivar00378171	ED3052	III	2355778	G	A	intron	H04J21.3	gip-1				NA	NA	NA	NA		NA
cewivar00378199	ED3052	III	2383417	T	C	intron	H14E04.2	H14E04.2				NA	NA	0.734	0.781		NA
cewivar00378209	ED3052	III	2416649	T	C	intron	W04B5.5	W04B5.5				NA	NA	NA	NA		NA
cewivar00735284	ED3052	III	2453989	G	GTT	intron	E02H9.8	nhr-121	insertion			NA	NA	NA	NA		NA
cewivar00829685	ED3052	III	2504689	1N	3N	intergenic			complex_change			NA	NA	NA	NA		NA
cewivar00829690	ED3052	III	2518329	3N	3N	intergenic			complex_change			NA	NA	NA	NA		NA
cewivar00735303	ED3052	III	2529876	AAAGCTT	A	intron	Y54F10AM.5	Y54F10AM.5	deletion			NA	NA	NA	NA		NA
cewivar00378354	ED3052	III	2611590	G	T	intron	Y71H2B.5	Y71H2B.5				NA	NA	NA	NA		NA
cewivar00378355	ED3052	III	2611592	G	C	intron	Y71H2B.5	Y71H2B.5				NA	NA	NA	NA		NA
cewivar00378380	ED3052	III	2630636	C	T	intron	Y71H2B.1	Y71H2B.1				NA	NA	NA	NA		NA
cewivar00735339	ED3052	III	2637408	G	GA	intron	H19M22.3	H19M22.3	insertion			NA	NA	NA	NA		NA
cewivar00735340	ED3052	III	2648733	AC	A	intergenic			deletion			NA	NA	NA	NA		NA
cewivar00829703	ED3052	III	2688449	26N	25N	intergenic			complex_change			NA	NA	NA	NA		NA
cewivar00378446	ED3052	III	2722654	C	T	intron	Y71H2AM.11	Y71H2AM.11				NA	NA	NA	NA		NA
cewivar00378447	ED3052	III	2724338	T	G	intron	Y71H2AM.11	Y71H2AM.11				NA	NA	NA	NA		NA
cewivar00378449	ED3052	III	2729014	A	T	intron	Y71H2AM.7	Y71H2AM.7				NA	NA	NA	NA		NA
cewivar00735365	ED3052	III	2738688	C	CA	intron	Y71H2AM.13	Y71H2AM.13	insertion			NA	NA	NA	NA		NA
cewivar00829706	ED3052	III	2754756	72N	22N	intergenic			complex_change			NA	NA	NA	NA		NA
cewivar00829707	ED3052	III	2774519	3N	5N	intergenic			complex_change			NA	NA	NA	NA		NA
cewivar00378457	ED3052	III	2817693	C	A	intergenic						NA	NA	NA	NA		NA
cewivar00735373	ED3052	III	2832009	G+35N	G	intron	Y71H2AM.1	Y71H2AM.1	deletion			NA	NA	NA	NA		NA
cewivar00378469	ED3052	III	2859601	A	T	intron	F56F11.4	F56F11.4				NA	NA	NA	NA		NA
cewivar00378509	ED3052	III	2870805	C	T	intergenic						NA	NA	NA	NA		NA
cewivar00829717	ED3052	III	2946310	11N	13N	intergenic			complex_change			NA	NA	NA	NA		NA
cewivar00378602	ED3052	III	3075212	C	G	intron	H06I04.3	H06I04.3				NA	NA	NA	NA		NA
cewivar00806561	ED3052	III	3122214	292N		intergenic			deletion			NA	NA	NA	NA		NA
cewivar00378612	ED3052	III	3283342	A	T	intron	Y53G8AR.7	Y53G8AR.7				NA	-4.59	-0.288	0.122		NA
cewivar00735416	ED3052	III	3341404	C	CAT	intergenic			insertion			NA	NA	NA	NA		NA
cewivar00378614	ED3052	III	3354668	G	A	intron	F45H7.2	gei-1				NA	NA	NA	NA		NA
cewivar00829725	ED3052	III	3394744		34N	intergenic			insertion			NA	NA	NA	NA		NA
cewivar00378616	ED3052	III	3425447	T	A	intergenic						NA	NA	0	0.711		NA
cewivar00378617	ED3052	III	3427610	T	A	intron	K01A11.2	K01A11.2				NA	NA	0	0.782		NA
cewivar00735418	ED3052	III	3441911	G+12N	G	intron	K01A11.4	spe-41	deletion			NA	NA	NA	NA		NA
cewivar00735420	ED3052	III	3464827	TA	T	intron	C34C12.3	pph-6	deletion			NA	NA	NA	NA		NA
cewivar00735424	ED3052	III	3593486	TCC	T	intron	C48D5.2	ptp-1	deletion			NA	NA	NA	NA		NA
cewivar00735429	ED3052	III	3655240	GAAAATT	G	intron	C46F11.5	C46F11.5	deletion			NA	NA	NA	NA		NA
cewivar00853039	ED3052	III	922012-988011	66000N		deletion
